# Supplementary material for: Barriers to Equitable Public Participation in Health-System Priority Setting Within the Context of Decentralization: The Case of Vulnerable Women in a Ugandan District
Source: PubMed Central journal article supplement (PMC9808191; doi:10.34172/ijhpm.2020.256), 2020-12-26
Supplement: ijhpm-11-1047-s003.pdf [file ijhpm-11-1047-s003.pdf]

### Supplementary file 3. Programme For Tororo District Local Government

Budget Conference at the Council Chambers on October 24, 2018

| <b>TIME</b>        | <b>PROGRAMME</b>                                                    | <b>PRESENTER</b>                        | <b>SESSION/CHAIRPERSON</b>                                                |
|--------------------|---------------------------------------------------------------------|-----------------------------------------|---------------------------------------------------------------------------|
| 8:30-9:00am        | Registration                                                        | Budget Desk                             | Budget Desk                                                               |
| 9:00-9:15 am       | Opening remarks                                                     | Ag District Chairperson                 | Chairperson for Finance, Planning Administration and Investment Committee |
| 9:15-9:30am        | Overview of the Budget conference                                   | CAO                                     |                                                                           |
| 9:30-9:45am        | Administration presentation                                         | D/CAO                                   |                                                                           |
| 9:45-9:55am        | Finance presentation                                                | CFO                                     |                                                                           |
| 9:55-10:05am       | Planning presentation                                               | D/Planner                               |                                                                           |
| 10:05-10:15am      | Statutory bodies presentation                                       | CTC                                     |                                                                           |
| 10:15-10:25 am     | Internal Audit presentation                                         | DIA                                     |                                                                           |
| 10:25-11:00 am     | Discussion of Finance Planning, Statutory bodies and Internal Audit | All                                     |                                                                           |
| 11:00-11:15 am     | Education presentation                                              | DEO                                     | Chairperson for Health and Education Committee                            |
| 11:15-11:30 am     | Health presentation                                                 | DHO                                     |                                                                           |
| 11:30am-12:00pm    | Discussion of Health and Education                                  | All                                     |                                                                           |
| 12:00-12:45pm      | Presentation by development partners 5 minutes each                 | Representatives of development partners |                                                                           |
| 12:45pm – 1:15pm   | Discussion on the partners presentation                             | All                                     |                                                                           |
| <b>1:15-2:00pm</b> | <b>Lunch</b>                                                        | <b>Budget Desk</b>                      | <b>Budget Desk</b>                                                        |
| 2:00 – 2:15pm      | Production and Marketing                                            | DPO                                     | Secretary for Production and Marketing                                    |
| 2:15 – 2:30pm      | Natural Resources                                                   | DNRO                                    |                                                                           |
| 2:30 – 3:00pm      | Discussion of Production and natural resources                      | All                                     |                                                                           |
| 3:00 - 3:15 pm     | Works and technical services                                        | D/Engineer                              | Chairperson for Works and technical services Committee                    |
| 3:15 – 3:45pm      | Discussion of works                                                 | D/Engineer                              |                                                                           |
| 3:45 – 4:00pm      | Community Based Services                                            | DCDO                                    | Chairperson for Community Based Service's Committee                       |
| 4:00 - 4:30pm      | Discussions of Community Development                                | All                                     |                                                                           |
| 4:30- 4:45pm       | Way Forward                                                         | CAO                                     |                                                                           |
| 4:45 – 5:00pm      | Closure                                                             | RDC                                     |                                                                           |
